# Supplementary material
Source: PubMed Central journal article supplement (PMC4840462)
Supplement: NIHMS751995-supplement-Supplemental.pdf [file NIHMS751995-supplement-Supplemental.pdf]

1                                    **SUPPORTING INFORMATION**

2                                    **for**

3                    **Oxidation of Plasmalogen, Lipoprotein, and RAW 264.7 Cells by**  
4                    **Photoactivatable Atomic Oxygen Precursors**

5                    Max T. Bourdillon<sup>1</sup>, Benjamin A. Ford<sup>2</sup>, Ashley T. Knulty<sup>3</sup>, Colleen N. Gray<sup>1</sup>, Miao  
6                                    Zhang<sup>1</sup>, David A. Ford<sup>\*2</sup>, Ryan D. McCulla<sup>\*1</sup>,

7                    <sup>1</sup>. Department of Chemistry, Saint Louis University, St. Louis, MO 63103, USA

8                    <sup>2</sup>. Department of Biochemistry and Molecular Biology, and Center for Cardiovascular  
9                    Research, Saint Louis University, School of Medicine, St. Louis, MO 6313, USA

10                    <sup>3</sup>. Department of Chemistry, College of the Ozarks, Point Lookout, MO 65726, USA

11                    \*Corresponding author e-mail: [rmccull2@slu.edu](mailto:rmccull2@slu.edu) (R. McCulla), [fordda@slu.edu](mailto:fordda@slu.edu)

12                                    (D. Ford)

13

14

## TABLE OF CONTENTS

15

Description of preparation of dibenzothiophene *S*-oxide.

16

Figure S1.

17

Figure S2.

18

Figure S3.

19

20 **Preparation of Dibenzothiophene- S- Oxide.** *m*-Chloroperoxybenzoic acid (28.8 mmol)  
21 dichloromethane (20 ml) solution was added slowly to a solution of Dibenzothiophenen (24  
22 mmol) at -78 °C in dichloromethane (20 ml) during 30 min. The mixture was stirred at this  
23 temperature for 2 hours then the reaction was quenched with a saturated aqueous solution of  
24 NaHCO<sub>3</sub>. The aqueous portion was extracted with dichloromethane several times. The  
25 combined organic layers were dried over MgSO<sub>4</sub>, and then the solvent was removed under  
26 reduced pressure. The residue was purified by column chromatography (Hexane/ethyl acetate)  
27 to afford desired compound in a 63% yield, which was confirmed by comparison to a  
28 previously reported NMR.<sup>1</sup> <sup>1</sup>H NMR (DMSO, 400Hz) δ 7.59 (2H, t, *J*=8Hz); δ 7.72 (2H, t,  
29 *J*=8Hz); δ 8.08 (2H, d, *J*=8Hz); δ 8.14 (2H, d, *J*=8Hz).

30

31

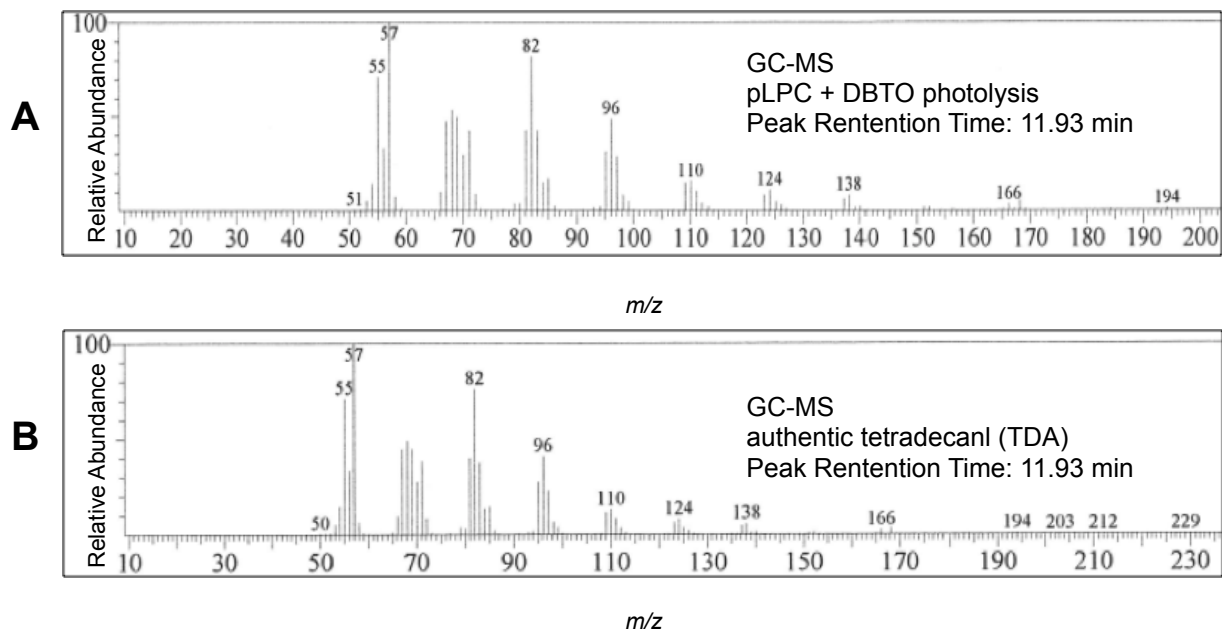

32

33 **Figure S1.** Comparison GC-MS results of unknown product from pLPC oxidation by UV

34 irradiation of DBTO to authentic sample of tetradecanal. A: GC-MS of unknown aldehyde. B:

35 GC-MS data for an authentic sample of tetradecanal.

36

37

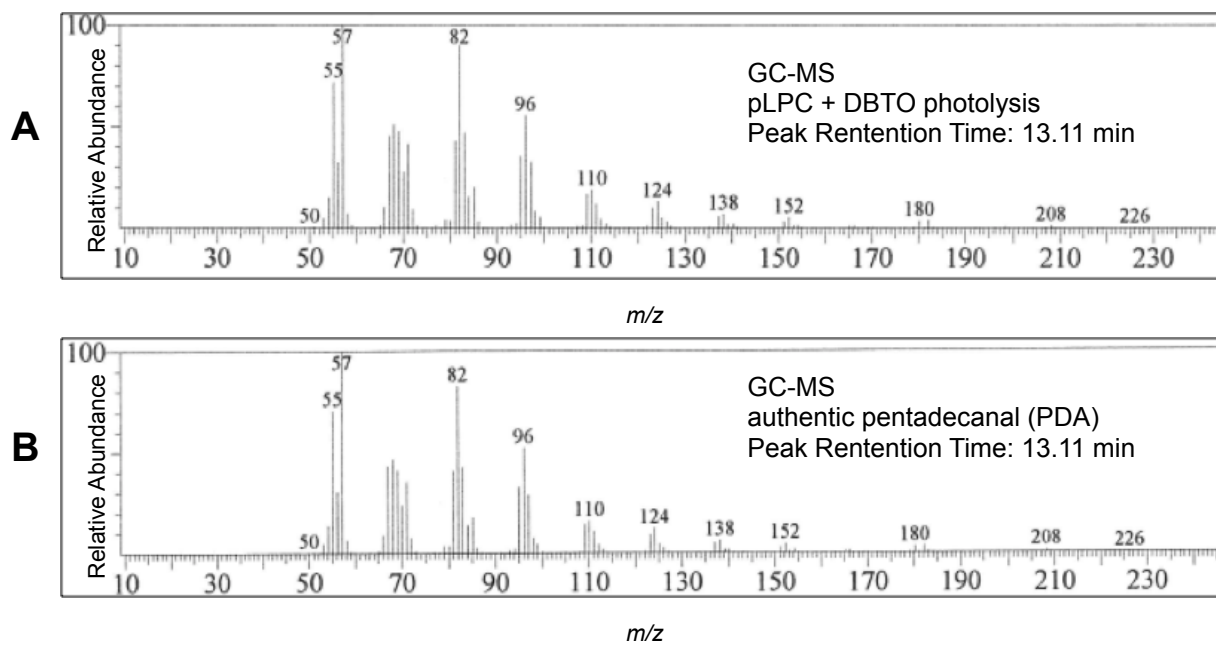

38

39 **Figure S2.** Comparison GC-MS results of unknown product from pLPC oxidation by UV  
40 irradiation of DBTO to authentic sample of pentadecanal. A: GC-MS of unknown aldehyde.  
41 B: GC-MS data for an authentic sample of pentadecanal.

42

43

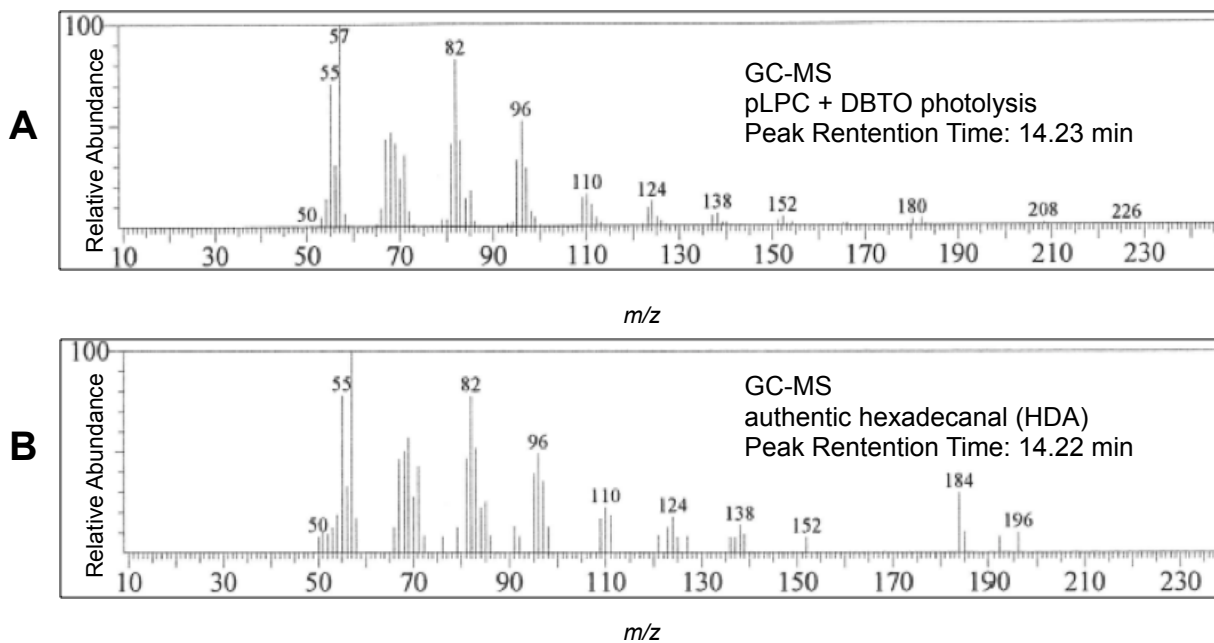

44

45 **Figure S3.** Comparison GC-MS results of unknown product from pLPC oxidation by UV  
 46 irradiation of DBTO to authentic sample of hexadecanal. A: GC-MS of unknown aldehyde. B:  
 47 GC-MS data for an authentic sample of hexadecanal.

48

## 49 REFERENCES

50 [1] Nelsen, S. F., Y. Luo, M. N. Weaver, J. V. Lockard, J. I. Zink, (2006) Optical spectra  
 51 of protected diamine 10-bond-bridged intervalence radical cations related to N,N,N'N'-  
 52 tetraalkylbenzidine. *J. Org. Chem.* **71**, 4286-4295.
